# Supplementary material
Source: ML conference proceedings conference paper supplement (https://openreview.net/forum?id=Q8m0TkIpJZ)

Mod. Arithmetic w/o Brackets

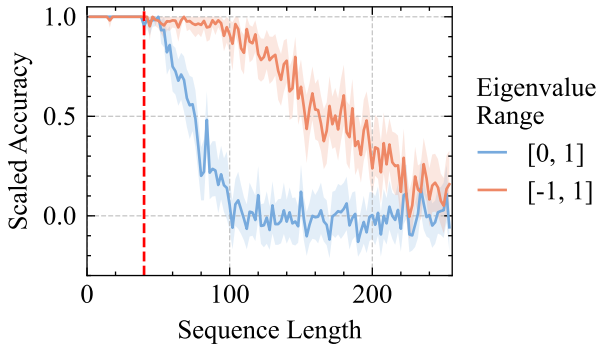

Supplement: supplementary_material [file mod-delta_mod-delta2.pdf › suppl_mat_neurips2025_blending_complementary/code/synthetic_algorithmic/pkl_files/mod-delta_mod-delta2.pdf]

Mod. Arithmetic w/o Brackets

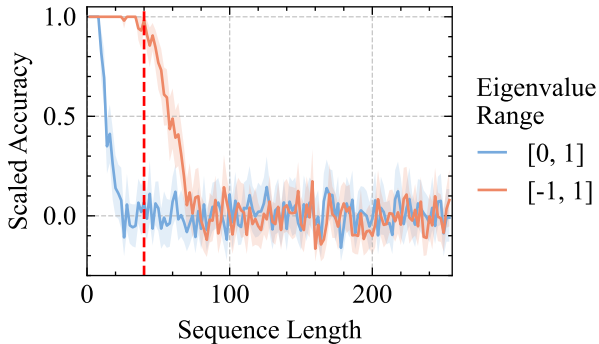

Supplement: supplementary_material [file mod-mamba_mod-mamba2.pdf › suppl_mat_neurips2025_blending_complementary/code/synthetic_algorithmic/pkl_files/mod-mamba_mod-mamba2.pdf]

Mod. Arithmetic w/o Brackets

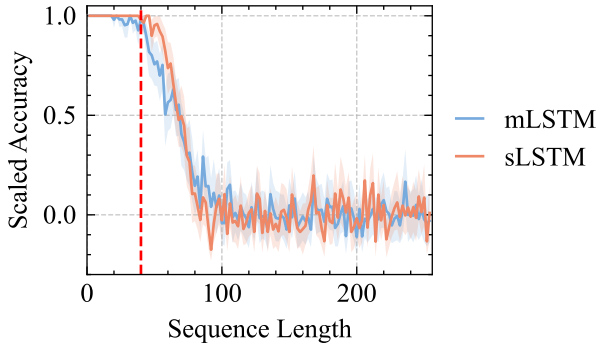

Supplement: supplementary_material [file mod-xlstm10_mod-xlstm01.pdf › suppl_mat_neurips2025_blending_complementary/code/synthetic_algorithmic/pkl_files/mod-xlstm10_mod-xlstm01.pdf]

Mod. Arithmetic w/ Brackets

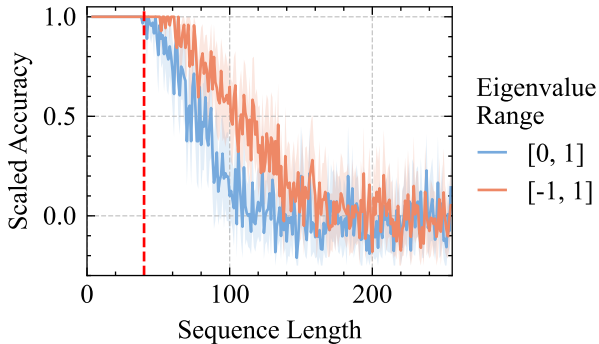

Supplement: supplementary_material [file modbra-delta_modbra-delta2.pdf › suppl_mat_neurips2025_blending_complementary/code/synthetic_algorithmic/pkl_files/modbra-delta_modbra-delta2.pdf]

Mod. Arithmetic w/ Brackets

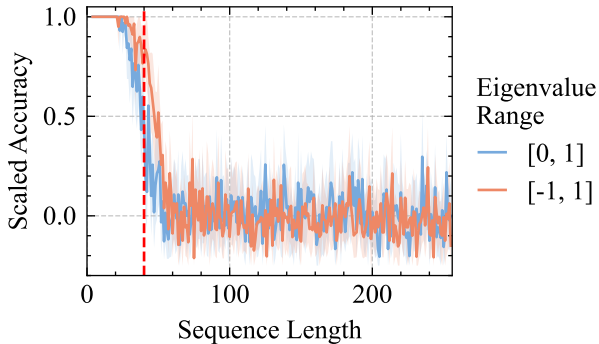

Supplement: supplementary_material [file modbra-mamba_modbra-mamba2.pdf › suppl_mat_neurips2025_blending_complementary/code/synthetic_algorithmic/pkl_files/modbra-mamba_modbra-mamba2.pdf]

Mod. Arithmetic w/ Brackets

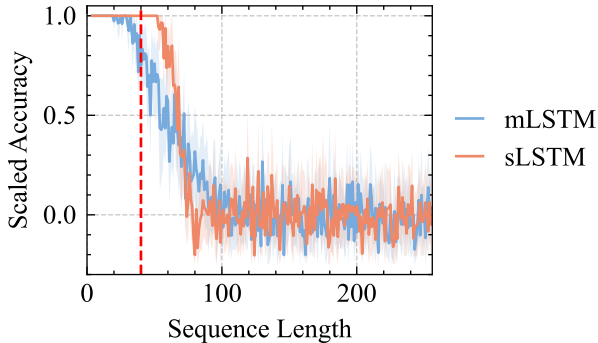

Supplement: supplementary_material [file modbra-xlstm10_modbra-xlstm01.pdf › suppl_mat_neurips2025_blending_complementary/code/synthetic_algorithmic/pkl_files/modbra-xlstm10_modbra-xlstm01.pdf]

Parity

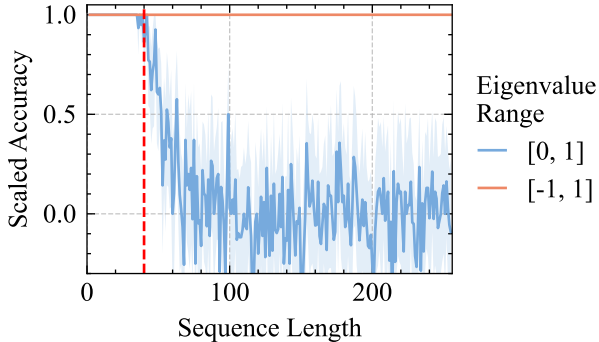

Supplement: supplementary_material [file parity-delta_parity-delta2.pdf › suppl_mat_neurips2025_blending_complementary/code/synthetic_algorithmic/pkl_files/parity-delta_parity-delta2.pdf]

Parity

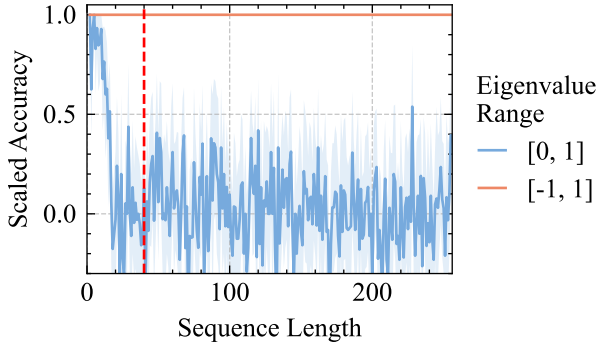

Supplement: supplementary_material [file parity-mamba_parity-mamba2.pdf › suppl_mat_neurips2025_blending_complementary/code/synthetic_algorithmic/pkl_files/parity-mamba_parity-mamba2.pdf]

Parity

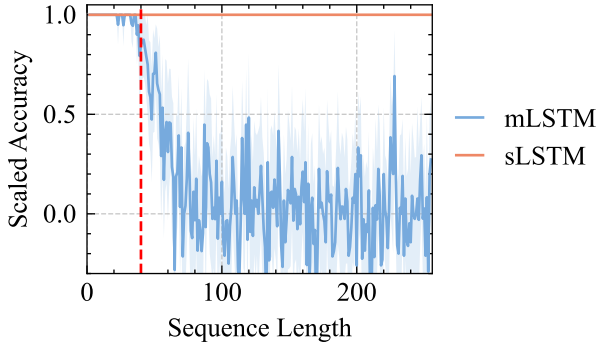

Supplement: supplementary_material [file parity-xlstm10_parity-xlstm01.pdf › suppl_mat_neurips2025_blending_complementary/code/synthetic_algorithmic/pkl_files/parity-xlstm10_parity-xlstm01.pdf]
